# Supplementary material for: Functional Characterization of the Nuclear Receptor Gene SaE75 in the Grain Aphid, Sitobion avenae
Source: MDPI journal article supplement (doi:10.3390/insects14040383), 2023-04-14
Supplement: s1 [file s1]

## Supplementary materials

|         |                                                                                                                                        |      |
|---------|----------------------------------------------------------------------------------------------------------------------------------------|------|
| ApE75X1 | MQLSQTVTSSGVLHMYSAER.....HQQQQQQQQQQQQQQLQQQQQHGGRFVPQSPGVVSSSTSGSGVSPFPAQHHLQLQQQHQQQQQQHQ                                            | 93   |
| ApE75X2 | .....                                                                                                                                  | 0    |
| ApE75X3 | .....                                                                                                                                  | 0    |
| ApE75X4 | .....                                                                                                                                  | 0    |
| SaE75X1 | MQLSQTVTSSGVLHMYSAERHQQQQQQQQQQQQQQQQQQQQPSQQQQQHGGRFVPQSPGVVSSSTSGSGVSPFPAQHHLQLQLQ.....                                              | 88   |
| SaE75X2 | .....                                                                                                                                  | 0    |
| SaE75X3 | .....                                                                                                                                  | 0    |
| SaE75X4 | .....                                                                                                                                  | 0    |
| ApE75X1 | QGGGQQGGGQQGGGQQGGGQQGGGQQGGGQCSLPAPFPSSSAATMRPPAAPGRCKVPVSAAITIKTYSRSEFMLESEPTSPIDLEFDGDT                                             | 193  |
| ApE75X2 | .....MTVINFKFADAVIQHSSQTACHLLLRLLAEFDGDT                                                                                               | 40   |
| ApE75X3 | .....MISQNEVTTTSVPARKCFDGD                                                                                                             | 23   |
| ApE75X4 | .....MIIIRWSEISEFDGDT                                                                                                                  | 21   |
| SaE75X1 | .....QQHQGGGQQGGGQQGGGQQGGGQQGGGQCSLPAPFPSSSAATMRPPAAPGRCKVPVSAAITIKTYSRSEFMLESEPTSPIDLEFDGDT                                          | 182  |
| SaE75X2 | .....MTVINFKFADAVIQHSSQTACHLLLRLLAEFDGDT                                                                                               | 40   |
| SaE75X3 | .....MISQNEVTTTSVPARKCFDGD                                                                                                             | 23   |
| SaE75X4 | .....MIIIRWSEISEFDGDT                                                                                                                  | 21   |
| ApE75X1 | <b>DNA binding domain (C domain)</b> VLCRVCGDRASGFHYGVSECGGCFRRRSIQKIQIYPCCTKNCCNILIRNRCQCYCLRRKCSVCGMSRDAVRFGRVPKREKARIMAAHQHSSNSKSKQ | 293  |
| ApE75X2 | VLCRVCGDRASGFHYGVSECGGCFRRRSIQKIQIYPCCTKNCCNILIRNRCQCYCLRRKCSVCGMSRDAVRFGRVPKREKARIMAAHQHSSNSKSKQ                                      | 140  |
| ApE75X3 | VLCRVCGDRASGFHYGVSECGGCFRRRSIQKIQIYPCCTKNCCNILIRNRCQCYCLRRKCSVCGMSRDAVRFGRVPKREKARIMAAHQHSSNSKSKQ                                      | 123  |
| ApE75X4 | VLCRVCGDRASGFHYGVSECGGCFRRRSIQKIQIYPCCTKNCCNILIRNRCQCYCLRRKCSVCGMSRDAVRFGRVPKREKARIMAAHQHSSNSKSKQ                                      | 121  |
| SaE75X1 | VLCRVCGDRASGFHYGVSECGGCFRRRSIQKIQIYPCCTKNCCNILIRNRCQCYCLRRKCSVCGMSRDAVRFGRVPKREKARIMAAHQHSSNSKSKQ                                      | 282  |
| SaE75X2 | VLCRVCGDRASGFHYGVSECGGCFRRRSIQKIQIYPCCTKNCCNILIRNRCQCYCLRRKCSVCGMSRDAVRFGRVPKREKARIMAAHQHSSNSKSKQ                                      | 140  |
| SaE75X3 | VLCRVCGDRASGFHYGVSECGGCFRRRSIQKIQIYPCCTKNCCNILIRNRCQCYCLRRKCSVCGMSRDAVRFGRVPKREKARIMAAHQHSSNSKSKQ                                      | 123  |
| SaE75X4 | VLCRVCGDRASGFHYGVSECGGCFRRRSIQKIQIYPCCTKNCCNILIRNRCQCYCLRRKCSVCGMSRDAVRFGRVPKREKARIMAAHQHSSNSKSKQ                                      | 121  |
| ApE75X1 | <b>P-box</b> EKAVAELEDQRLVASVVRHALETCDFTSKDVAPTLARAREQPNYTLCHPTLACPLNPSFRVITGQOELLNDFSKRFSPAIRGVVEFAKRIPGFGLLAQ                        | 393  |
| ApE75X2 | EKAVAELEDQRLVASVVRHALETCDFTSKDVAPTLARAREQPNYTLCHPTLACPLNPSFRVITGQOELLNDFSKRFSPAIRGVVEFAKRIPGFGLLAQ                                     | 240  |
| ApE75X3 | EKAVAELEDQRLVASVVRHALETCDFTSKDVAPTLARAREQPNYTLCHPTLACPLNPSFRVITGQOELLNDFSKRFSPAIRGVVEFAKRIPGFGLLAQ                                     | 223  |
| ApE75X4 | EKAVAELEDQRLVASVVRHALETCDFTSKDVAPTLARAREQPNYTLCHPTLACPLNPSFRVITGQOELLNDFSKRFSPAIRGVVEFAKRIPGFGLLAQ                                     | 221  |
| SaE75X1 | EKAVAELEDQRLVASVVRHALETCDFTSKDVAPTLARAREQPNYTLCHPTLACPLNPSFRVITGQOELLNDFSKRFSPAIRGVVEFAKRIPGFGLLAQ                                     | 382  |
| SaE75X2 | EKAVAELEDQRLVASVVRHALETCDFTSKDVAPTLARAREQPNYTLCHPTLACPLNPSFRVITGQOELLNDFSKRFSPAIRGVVEFAKRIPGFGLLAQ                                     | 240  |
| SaE75X3 | EKAVAELEDQRLVASVVRHALETCDFTSKDVAPTLARAREQPNYTLCHPTLACPLNPSFRVITGQOELLNDFSKRFSPAIRGVVEFAKRIPGFGLLAQ                                     | 223  |
| SaE75X4 | EKAVAELEDQRLVASVVRHALETCDFTSKDVAPTLARAREQPNYTLCHPTLACPLNPSFRVITGQOELLNDFSKRFSPAIRGVVEFAKRIPGFGLLAQ                                     | 221  |
| ApE75X1 | DDQVTLKAGVFEVLLVRLACMFDSECNMVTINGQVLRRESVCAYSNARFITDSMFEEAERLNAMRLNDEISGLFNAVIVIAADRPGLRNVFEIERMHK                                     | 493  |
| ApE75X2 | DDQVTLKAGVFEVLLVRLACMFDSECNMVTINGQVLRRESVCAYSNARFITDSMFEEAERLNAMRLNDEISGLFNAVIVIAADRPGLRNVFEIERMHK                                     | 340  |
| ApE75X3 | DDQVTLKAGVFEVLLVRLACMFDSECNMVTINGQVLRRESVCAYSNARFITDSMFEEAERLNAMRLNDEISGLFNAVIVIAADRPGLRNVFEIERMHK                                     | 323  |
| ApE75X4 | DDQVTLKAGVFEVLLVRLACMFDSECNMVTINGQVLRRESVCAYSNARFITDSMFEEAERLNAMRLNDEISGLFNAVIVIAADRPGLRNVFEIERMHK                                     | 321  |
| SaE75X1 | DDQVTLKAGVFEVLLVRLACMFDSECNMVTINGQVLRRESVCAYSNARFITDSMFEEAERLNAMRLNDEISGLFNAVIVIAADRPGLRNVFEIERMHK                                     | 482  |
| SaE75X2 | DDQVTLKAGVFEVLLVRLACMFDSECNMVTINGQVLRRESVCAYSNARFITDSMFEEAERLNAMRLNDEISGLFNAVIVIAADRPGLRNVFEIERMHK                                     | 340  |
| SaE75X3 | DDQVTLKAGVFEVLLVRLACMFDSECNMVTINGQVLRRESVCAYSNARFITDSMFEEAERLNAMRLNDEISGLFNAVIVIAADRPGLRNVFEIERMHK                                     | 323  |
| SaE75X4 | DDQVTLKAGVFEVLLVRLACMFDSECNMVTINGQVLRRESVCAYSNARFITDSMFEEAERLNAMRLNDEISGLFNAVIVIAADRPGLRNVFEIERMHK                                     | 321  |
| ApE75X1 | QKLCALQSVLMQNHPDRPFLSQELLKKIPDLRTINTLHSEKLLAFKMTQOQNLDDQQQHHQQHQDTTTTTISASAAVQHHQNIIGGWSLMNNDTDFN                                      | 593  |
| ApE75X2 | QKLCALQSVLMQNHPDRPFLSQELLKKIPDLRTINTLHSEKLLAFKMTQOQNLDDQQQHHQQHQDTTTTTISASAAVQHHQNIIGGWSLMNNDTDFN                                      | 440  |
| ApE75X3 | QKLCALQSVLMQNHPDRPFLSQELLKKIPDLRTINTLHSEKLLAFKMTQOQNLDDQQQHHQQHQDTTTTTISASAAVQHHQNIIGGWSLMNNDTDFN                                      | 423  |
| ApE75X4 | QKLCALQSVLMQNHPDRPFLSQELLKKIPDLRTINTLHSEKLLAFKMTQOQNLDDQQQHHQQHQDTTTTTISASAAVQHHQNIIGGWSLMNNDTDFN                                      | 421  |
| SaE75X1 | QKLCALQSVLMQNHPDRPFLSQELLKKIPDLRTINTLHSEKLLAFKMTQOQNLDDQQQHHQQHQDTTTTTISASAAVQHHQNIIGGWSLMNNDTDFN                                      | 579  |
| SaE75X2 | QKLCALQSVLMQNHPDRPFLSQELLKKIPDLRTINTLHSEKLLAFKMTQOQNLDDQQQHHQQHQDTTTTTISASAAVQHHQNIIGGWSLMNNDTDFN                                      | 437  |
| SaE75X3 | QKLCALQSVLMQNHPDRPFLSQELLKKIPDLRTINTLHSEKLLAFKMTQOQNLDDQQQHHQQHQDTTTTTISASAAVQHHQNIIGGWSLMNNDTDFN                                      | 420  |
| SaE75X4 | QKLCALQSVLMQNHPDRPFLSQELLKKIPDLRTINTLHSEKLLAFKMTQOQNLDDQQQHHQQHQDTTTTTISASAAVQHHQNIIGGWSLMNNDTDFN                                      | 418  |
| ApE75X1 | RKSPPEAGSSSSWSDTETSVEDMKSLAMLDEVKSPGLGSVSTSEVCSDEYHHGFSKHAASAPLLAASLAGAVCPIRRHAAAFPSDELHHQVIVRPMSCRRVQ                                 | 693  |
| ApE75X2 | RKSPPEAGSSSSWSDTETSVEDMKSLAMLDEVKSPGLGSVSTSEVCSDEYHHGFSKHAASAPLLAASLAGAVCPIRRHAAAFPSDELHHQVIVRPMSCRRVQ                                 | 540  |
| ApE75X3 | RKSPPEAGSSSSWSDTETSVEDMKSLAMLDEVKSPGLGSVSTSEVCSDEYHHGFSKHAASAPLLAASLAGAVCPIRRHAAAFPSDELHHQVIVRPMSCRRVQ                                 | 523  |
| ApE75X4 | RKSPPEAGSSSSWSDTETSVEDMKSLAMLDEVKSPGLGSVSTSEVCSDEYHHGFSKHAASAPLLAASLAGAVCPIRRHAAAFPSDELHHQVIVRPMSCRRVQ                                 | 521  |
| SaE75X1 | RKSPPEAGSSSSWSDTETSVEDMKSLAMLDEVKSPGLGSVSTSEVCSDEYHHGFSKHAASAPLLAASLAGAVCPIRRHAAAFPSDELHHQVIVRPMSCRRVQ                                 | 679  |
| SaE75X2 | RKSPPEAGSSSSWSDTETSVEDMKSLAMLDEVKSPGLGSVSTSEVCSDEYHHGFSKHAASAPLLAASLAGAVCPIRRHAAAFPSDELHHQVIVRPMSCRRVQ                                 | 537  |
| SaE75X3 | RKSPPEAGSSSSWSDTETSVEDMKSLAMLDEVKSPGLGSVSTSEVCSDEYHHGFSKHAASAPLLAASLAGAVCPIRRHAAAFPSDELHHQVIVRPMSCRRVQ                                 | 520  |
| SaE75X4 | RKSPPEAGSSSSWSDTETSVEDMKSLAMLDEVKSPGLGSVSTSEVCSDEYHHGFSKHAASAPLLAASLAGAVCPIRRHAAAFPSDELHHQVIVRPMSCRRVQ                                 | 518  |
| ApE75X1 | RKQDSPTDSGIESGTEKLRDPMHSAPTSVCSFSRSTVEDAVMSADSHHHAIEDMPVLKRVLQAPPLYDNTSLMDEAYKPHKKFRALRSKAKDSAEAEAV                                    | 792  |
| ApE75X2 | RKQDSPTDSGIESGTEKLRDPMHSAPTSVCSFSRSTVEDAVMSADSHHHAIEDMPVLKRVLQAPPLYDNTSLMDEAYKPHKKFRALRSKAKDSAEAEAV                                    | 639  |
| ApE75X3 | RKQDSPTDSGIESGTEKLRDPMHSAPTSVCSFSRSTVEDAVMSADSHHHAIEDMPVLKRVLQAPPLYDNTSLMDEAYKPHKKFRALRSKAKDSAEAEAV                                    | 622  |
| ApE75X4 | RKQDSPTDSGIESGTEKLRDPMHSAPTSVCSFSRSTVEDAVMSADSHHHAIEDMPVLKRVLQAPPLYDNTSLMDEAYKPHKKFRALRSKAKDSAEAEAV                                    | 620  |
| SaE75X1 | RKQDSPTDSGIESGTEKLRDPMHSAPTSVCSFSRSTVEDAVMSADSHHHAIEDMPVLKRVLQAPPLYDNTSLMDEAYKPHKKFRALRSKAKDSAEAEAV                                    | 779  |
| SaE75X2 | RKQDSPTDSGIESGTEKLRDPMHSAPTSVCSFSRSTVEDAVMSADSHHHAIEDMPVLKRVLQAPPLYDNTSLMDEAYKPHKKFRALRSKAKDSAEAEAV                                    | 637  |
| SaE75X3 | RKQDSPTDSGIESGTEKLRDPMHSAPTSVCSFSRSTVEDAVMSADSHHHAIEDMPVLKRVLQAPPLYDNTSLMDEAYKPHKKFRALRSKAKDSAEAEAV                                    | 620  |
| SaE75X4 | RKQDSPTDSGIESGTEKLRDPMHSAPTSVCSFSRSTVEDAVMSADSHHHAIEDMPVLKRVLQAPPLYDNTSLMDEAYKPHKKFRALRSKAKDSAEAEAV                                    | 618  |
| ApE75X1 | RPVSATTVHNNSTLLNLHQSSHNNSPQLHHLLTSSLSSTHSTLAKSLRETPKMTAEQIKRTEDIHNFIMREDTACSGYQOOLTQOHHHHHHNNNNHH                                      | 892  |
| ApE75X2 | RPVSATTVHNNSTLLNLHQSSHNNSPQLHHLLTSSLSSTHSTLAKSLRETPKMTAEQIKRTEDIHNFIMREDTACSGYQOOLTQOHHHHHHNNNNHH                                      | 739  |
| ApE75X3 | RPVSATTVHNNSTLLNLHQSSHNNSPQLHHLLTSSLSSTHSTLAKSLRETPKMTAEQIKRTEDIHNFIMREDTACSGYQOOLTQOHHHHHHNNNNHH                                      | 722  |
| ApE75X4 | RPVSATTVHNNSTLLNLHQSSHNNSPQLHHLLTSSLSSTHSTLAKSLRETPKMTAEQIKRTEDIHNFIMREDTACSGYQOOLTQOHHHHHHNNNNHH                                      | 720  |
| SaE75X1 | RPVSATTVHNNSTLLNLHQSSHNNSPQLHHLLTSSLSSTHSTLAKSLRETPKMTAEQIKRTEDIHNFIMREDTACSGYQOOLTQOHHHHHHNNNNHH                                      | 879  |
| SaE75X2 | RPVSATTVHNNSTLLNLHQSSHNNSPQLHHLLTSSLSSTHSTLAKSLRETPKMTAEQIKRTEDIHNFIMREDTACSGYQOOLTQOHHHHHHNNNNHH                                      | 737  |
| SaE75X3 | RPVSATTVHNNSTLLNLHQSSHNNSPQLHHLLTSSLSSTHSTLAKSLRETPKMTAEQIKRTEDIHNFIMREDTACSGYQOOLTQOHHHHHHNNNNHH                                      | 720  |
| SaE75X4 | RPVSATTVHNNSTLLNLHQSSHNNSPQLHHLLTSSLSSTHSTLAKSLRETPKMTAEQIKRTEDIHNFIMREDTACSGYQOOLTQOHHHHHHNNNNHH                                      | 718  |
| ApE75X1 | LEQQCPPTRWQHTFVITTSALAQNSCRLSPTEPFSRYASSTVSSGGVLARVLSPSSSSSCAPPPSALSVMVMRRTSPSNVNLQVGITN.....AAAAAEEAAAH                               | 989  |
| ApE75X2 | LEQQCPPTRWQHTFVITTSALAQNSCRLSPTEPFSRYASSTVSSGGVLARVLSPSSSSSCAPPPSALSVMVMRRTSPSNVNLQVGITN.....AAAAAEEAAAH                               | 836  |
| ApE75X3 | LEQQCPPTRWQHTFVITTSALAQNSCRLSPTEPFSRYASSTVSSGGVLARVLSPSSSSSCAPPPSALSVMVMRRTSPSNVNLQVGITN.....AAAAAEEAAAH                               | 819  |
| ApE75X4 | LEQQCPPTRWQHTFVITTSALAQNSCRLSPTEPFSRYASSTVSSGGVLARVLSPSSSSSCAPPPSALSVMVMRRTSPSNVNLQVGITN.....AAAAAEEAAAH                               | 817  |
| SaE75X1 | CEQQCPPTRWQHTFVITTSALAQNSCRLSPTEPFSRYASSTVSSGGVLARVLSPSSSSSCAPPPSALSVMVMRRTSPSNVNLQVGITN.....AAAAAEEAAAH                               | 979  |
| SaE75X2 | CEQQCPPTRWQHTFVITTSALAQNSCRLSPTEPFSRYASSTVSSGGVLARVLSPSSSSSCAPPPSALSVMVMRRTSPSNVNLQVGITN.....AAAAAEEAAAH                               | 820  |
| SaE75X3 | CEQQCPPTRWQHTFVITTSALAQNSCRLSPTEPFSRYASSTVSSGGVLARVLSPSSSSSCAPPPSALSVMVMRRTSPSNVNLQVGITN.....AAAAAEEAAAH                               | 837  |
| SaE75X4 | CEQQCPPTRWQHTFVITTSALAQNSCRLSPTEPFSRYASSTVSSGGVLARVLSPSSSSSCAPPPSALSVMVMRRTSPSNVNLQVGITN.....AAAAAEEAAAH                               | 818  |
| ApE75X1 | QQPLNLSKKLSFSPTSAVSGGTTTPSPAPAQVAMEA.....                                                                                              | 1026 |
| ApE75X2 | QQPLNLSKKLSFSPTSAVSGGTTTPSPAPAQVAMEA.....                                                                                              | 873  |
| ApE75X3 | QQPLNLSKKLSFSPTSAVSGGTTTPSPAPAQVAMEA.....                                                                                              | 856  |
| ApE75X4 | QQPLNLSKKLSFSPTSAVSGGTTTPSPAPAQVAMEA.....                                                                                              | 854  |
| SaE75X1 | QQPLNLSKKLSFSPTSAVSGGTTTPSPAPAQVAMEA.....                                                                                              | 1016 |
| SaE75X2 | QQPLNLSKKLSFSPTSAVSGGTTTPSPAPAQVAMEA.....                                                                                              | 874  |
| SaE75X3 | QQPLNLSKKLSFSPTSAVSGGTTTPSPAPAQVAMEA.....                                                                                              | 857  |
| SaE75X4 | QQPLNLSKKLSFSPTSAVSGGTTTPSPAPAQVAMEA.....                                                                                              | 855  |

**Figure S1.** Multiple alignment of amino acid sequence characteristics of E75 isoforms between *S. avenae* and *A. pisum*. The DNA binding domain (C domain), the hinge domain (D domain), and the ligand binding domain (E domain) are tagged above the sequence with blue, green, and red lines, respectively; the black triangles indicate that there are four Cys residues in the zinc finger, and the important amino acid residues involved in heme binding are marked with the black arrow.

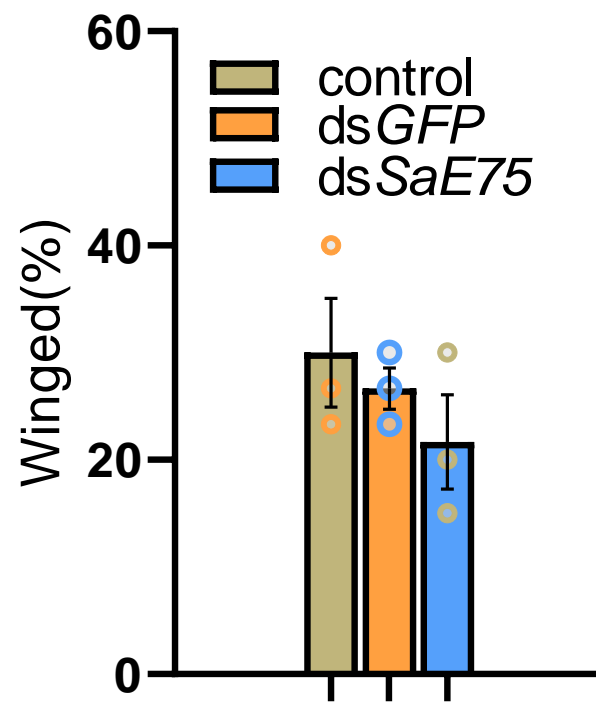

**Figure S2.** Functional analysis of *SaE75* on *S. avenae* wing development. Different color circle represents three replications of experiment. Error bars represent means  $\pm$  SD.

## Tables

**Table S1. Primer information in this study**

| Gene                  | Primer sequences                                     | Application              | Length of product (bp) | Amplification efficiency |
|-----------------------|------------------------------------------------------|--------------------------|------------------------|--------------------------|
| <i>SaE75X1</i><br>F   | ATGCAGTTGTCTCAAGTCGTA                                | cDNA cloning             | 3048                   | -                        |
| <i>SaE75X1</i><br>R   | TTACGCTTCCATGGCCACCTGAGCG                            |                          |                        |                          |
| <i>SaE75X2</i><br>F   | TTACGCTTCCATGGCCACC                                  |                          | 2625                   | -                        |
| <i>SaE75X2</i><br>R   | ATGACCGTTATAAATTTCAA                                 |                          |                        |                          |
| <i>SaE75X3</i><br>F   | ATGATTAGTCAAAACGAAGTC                                |                          | 2571                   | -                        |
| <i>SaE75X3</i><br>R   | ATGGCCACCTGAGCGGGAGCA                                |                          |                        |                          |
| <i>SaE75X4</i><br>F   | ATGCCAGACACGATAATTATC                                |                          | 2505                   | -                        |
| <i>SaE75X4</i><br>R   | ACGGCGGACGTCGGCGACGGGGACA                            |                          |                        |                          |
| * <i>SaE75F</i>       | CGACTCTGAGTGTAACAGCA                                 | RT-qPCR                  | 165                    | 103.4%                   |
| * <i>SaE75R</i>       | GCGTTGAATAGACCAATTTC                                 |                          | 194                    | 93.7%                    |
| <i>Saftz-f1F</i>      | CAGACATAATCCTCCGTCAT                                 |                          |                        |                          |
| <i>Saftz-f1R</i>      | GTCTTGGCTGTATTGGTGAT                                 |                          | 199                    | 97.3%                    |
| <i>Sabr-cF</i>        | CTGAGAGACGATGAGGACTT                                 | RT-qPCR (Reference gene) | 151                    | 96.9%                    |
| <i>Sabr-cR</i>        | CGTGGTAGATGAACTCAACC                                 |                          | 152                    | 103.0%                   |
| <i>SaHr3F</i>         | GTCCCGACATTATGACCTAC                                 |                          |                        |                          |
| <i>SaHr3R</i>         | CAGTAAGTTTCAACGAAGCC                                 |                          |                        |                          |
| <i>HELF</i>           | TGCTACCGGATGTGGGAAAA                                 | RNAi                     | 377                    | -                        |
| <i>HELRL</i>          | TCCAGCCACGTTCTCTGTTT                                 |                          |                        |                          |
| * <i>dsSaE75</i><br>F | <u>taatacgactcactataggg</u> GGTCTATTCAACGCCGT<br>CAT |                          | 424                    | -                        |
| * <i>dsSaE75</i><br>R | <u>taatacgactcactataggg</u> GCGAAGTCGAACATGGA<br>GTC |                          |                        |                          |
| <i>dsGFPF</i>         | <u>taatacgactcactataggg</u> CCTGTTCCATGGCCAAC        | RNAi                     | 424                    | -                        |
| <i>dsGFPR</i>         | <u>taatacgactcactataggg</u> AAAGGACAGGGCCATC<br>G    |                          |                        |                          |

Note: \* means the primers were designed from the common region of *SaE75X1-X4*; sequences of T7 promoter in primers were lowercase alphabet.

**Table S2. Species information for phylogenetic tree used in this study**

| Order       | Species                               | Gene name                                                         | GenBank accession number                                                                       |
|-------------|---------------------------------------|-------------------------------------------------------------------|------------------------------------------------------------------------------------------------|
| Hemiptera   | <i>Acyrtosiphon pisum</i>             | <i>ApE75X1, ApE75X2, ApE75X3, ApE75X4</i>                         | XP_016657682.1, XP_008180288.1, XP_008180289.1, XP_008180290.1                                 |
|             | <i>Aphis gossypii</i>                 | <i>AgE75X1, AgE75X2, AgE75X3, AgE75X4</i>                         | XP_050054422.1, XP_050054429.1, XP_050054432.1, XP_050054438.1                                 |
|             | <i>Diuraphis noxia</i>                | <i>DnE75X1, DnE75X2, DnE75X3, DnE75X4</i>                         | XP_015372971.1, XP_015372972.1, XP_015372973., XP_015372974.1                                  |
|             | <i>Melanaphis sacchari</i>            | <i>MsaE75X1, MsaE75X2, MsaE75X3</i>                               | XP_025206796.1, XP_025206797.1, XP_025206798.1                                                 |
|             | <i>Myzus persicae</i>                 | <i>MpE75X1, MpE75X2, MpE75X3, MpE75X4</i>                         | XP_022162355.1, XP_022162356.1, XP_022162357.1, XP_022162358.1                                 |
|             | <i>Rhopalosiphum maidis</i>           | <i>RmE75X1, RmE75X2, RmE75X3</i>                                  | XP_026814295.1, XP_026814296.1, XP_026814297.1                                                 |
|             | <i>Sitobion avenae</i>                | <i>SaE75X1, SaE75X2, SaE75X3, SaE75X4</i>                         | OP058107, OP058108, OP058109, OP058110                                                         |
|             | <i>Apolygus lucorum</i>               | <i>AluE75A, AluE75B, AluE75C</i>                                  | ATN39778.1, KAF6203537.1, ATN39780.1                                                           |
|             | <i>Bemisia tabaci</i>                 | <i>BtaE75X1, BtaE75X2, BtaE75X3, BtaE75X4</i>                     | XP_018907601.1, XP_018907602.1, XP_018907603.1, XP_018907604.1                                 |
|             | <i>Cimex lectularius</i>              | <i>CIE75X1, CIE75X2, CIE75X3</i>                                  | XP_014240379.1, XP_014240380.1, XP_014240381.1                                                 |
|             | <i>Homalodisca vitripennis</i>        | <i>HvE75X1, HvE75X2, HvE75X3, HvE75X4, HvE75X5</i>                | XP_046680981.1, XP_046680982.1, XP_046680983.1, XP_046680984.1, XP_046680985.1                 |
| Blattodea   | <i>Nilaparvata lugens</i>             | <i>NIE75X1, NIE75X2</i>                                           | XP_039292205.1, AST48086.1                                                                     |
|             | <i>Blattella germanica</i>            | <i>BgE75A, BgE75B, BgE75C, BgE75D, BgE75E</i>                     | CAJ87513.1, CAJ87514.1, CAM97373.1, CAM97374.1, CAM97375.1                                     |
|             | <i>Cryptotermes secundus</i>          | <i>CsE75X1, CsE75X2, CsE75X3, CsE75X4</i>                         | XP_023709200.1, XP_023709201.2, XP_023709202.1, XP_023709203.1                                 |
|             | <i>Zootermopsis nevadensis</i>        | <i>ZnE75X1, ZnE75X2, ZnE75X3, ZnE75X4</i>                         | XP_021938067.1, XP_021938068.1, XP_021938069 .1, XP_021938070.1                                |
| Coleoptera  | <i>Diabrotica virgifera virgifera</i> | <i>DvvE75X1, DvvE75X2, DvvE75X3, DvvE75X4, DvvE75X5, DvvE75X6</i> | XP_028130296.1, XP_028130297.1, XP_028130298.1, XP_028130301.1, XP_028130302.1, XP_028130303.1 |
|             | <i>Leptinotarsa decemlineata</i>      | <i>LdE75X1, LdE75X2, LdE75X3</i>                                  | AKN56577.1, AKN56578.1, ALU57795.1                                                             |
|             | <i>Tribolium castaneum</i>            | <i>TcE75X1, TcE75X2, TcE75X3, TcE75X4, TcE75X5</i>                | NP_001308599.1.1, XP_008197844, XP_971362.2, XP_015838721, XP_015838722.1                      |
| Hymenoptera | <i>Apis laboriosa</i>                 | <i>AlaE75X1, AlaE75X2</i>                                         | XP_043795752.1, XP_043795762.1                                                                 |
|             | <i>Apis mellifera</i>                 | <i>AmE75X1, AmE75X2, AmE75X3</i>                                  | XP_006564381.2, XP_006564382.1, XP_006564383.2                                                 |
|             | <i>Friesiella melittae</i>            | <i>FvE75X1, FvE75X2, FvE75X3</i>                                  | XP_043510979.1, XP_043510980.1, XP_043510981.1                                                 |
|             | <i>Camponotus floridanus</i>          | <i>CfE75X1, CfE75X2, CfE75X3, CfE75X4</i>                         | XP_025268006.1, XP_025268007.1, XP_011259848.2, XP_011259847.2                                 |
|             | <i>Linepithema humile</i>             | <i>LhE75X1, LhE75X2, LhE75X3, LhE75X4</i>                         | XP_012226918.1, XP_012226919.1, XP_012226920.1, XP_012226921.1                                 |
|             | <i>Ooceraea biroii</i>                | <i>ObE75X1, ObE75X2, ObE75X3</i>                                  | XP_011332916.2, XP_019886380.2, XP_011332918.2                                                 |
| Orthoptera  | <i>Schistocerca gregaria</i>          | <i>SgE75X1, SgE75X2, SgE75X3, SgE75X4</i>                         | XP_049859092.1, XP_049859093.1, XP_049859094.1, XP_049859095.1                                 |
|             | <i>Schistocerca cancellate</i>        | <i>ScE75X1, ScE75X2, ScE75X3, ScE75X4</i>                         | XP_049778571.1, XP_049778572.1, XP_049778573.1, XP_049778574.1                                 |
|             | <i>Schistocerca americana</i>         | <i>SamE75X1, SamE75X2, SamE75X3, SamE75X4,</i>                    | XP_046992523.1, XP_046992524.1, XP_046992525.1, XP_046992527.1                                 |

|             |                                      |                                                                             |                                                                                                    |
|-------------|--------------------------------------|-----------------------------------------------------------------------------|----------------------------------------------------------------------------------------------------|
| Diptera     |                                      | <i>SamE75X5</i>                                                             |                                                                                                    |
|             | <i>Schistocerca serialis cubense</i> | <i>SscE75X1, SscE75X2, SscE75X3, SscE75X4, SscE75X5</i>                     | XP_049956056.1, XP_049956057.1, XP_049956059.1, XP_049956060.1, XP_049956061.1                     |
|             | <i>Schistocerca piceifrons</i>       | <i>SpE75X1, SpE75X2, SpE75X3, SpE75X4, SpE75X5</i>                          | XP_047110316.1, XP_047110317.1, XP_047110319.1, XP_047110320.1                                     |
|             | <i>Schistocerca nitens</i>           | <i>SnE75X1, SnE75X2, SnE75X3, SnE75X4, SnE75X5</i>                          | XP_049807890.1, XP_049807891.1, XP_049807892.1, XP_049807893.1, XP_049807894.1                     |
|             | <i>Locusta migratoria</i>            | <i>LmE75X1, LmE75X2, LmE75X3</i>                                            | QKY88966.1, QKY88967.1, QKY88968.1                                                                 |
|             | <i>Aedes aegypti</i>                 | <i>AaeE75A, AaeE75B, AaeE75C</i>                                            | CAL36974.1, CAL36973.1, CAL36975.1                                                                 |
|             | <i>Aedes albopictus</i>              | <i>AalE75X1, AalE75X2, AalE75X3</i>                                         | XP_029720431.1, XP_019556691.1, XP_019556692.1                                                     |
|             | <i>Culex quinquefasciatus</i>        | <i>CqE75X1, CqE75X2, CqE75X3</i>                                            | XP_038113830.1, XP_001849917.2, XP_038113837.1                                                     |
|             | <i>Bactrocera neohumeralis</i>       | <i>BnE75BX1, BnE75BX2, BnE75BX3, BnE75BX4, BnE75BX5, BnE75BX6</i>           | XP_050336968.1, XP_050336969.1, XP_050336970.1, XP_050336971.1, XP_050336972.1, XP_050336973.1     |
|             | <i>Bactrocera tryoni</i>             | <i>BtrE75BX1, BtrE75BX2, BtrE75BX3, BtrE75BX4, BtrE75BX5, BtrE75BX6</i>     | XP_039965865.1, XP_039965866.1, XP_039965868.1, XP_039965869.1, XP_039965870.1, XP_039965871.1     |
|             | <i>Bactrocera dorsalis</i>           | <i>BdE75BX1, BdE75BX2, BdE75BX3, BdE75BX4, BdE75BX5</i>                     | XP_049315304.1, XP_049315306.1, XP_049315307.1, XP_049315308.1, XP_049315309.1                     |
|             | <i>Drosophila mauritiana</i>         | <i>DmaE75BX1, DmaE75BX2, DmaE75BX3, DmaE75BX4</i>                           | XP_033157614.1, XP_033157615.1, XP_033157616.1, XP_033157617.1                                     |
| Lepidoptera | <i>Drosophila simulans</i>           | <i>DsE75BX1, DsE75BX2, DsE75BX3, DsE75BX4, DsE75BX5</i>                     | XP_039149874.1, XP_016032380.2, XP_039149875.2, XP_039149876.1, XP_016032381.2                     |
|             | <i>Drosophila melanogaster</i>       | <i>DmeE75BA, DmeE75BB, DmeE75BC, DmeE75BD, DmeE75BE, DmeE75BF, DmeE75BG</i> | NP_524133.2, NP_730321.1, NP_730322.1, NP_730323.1, NP_001246821.1, NP_001246822.1, NP_001303380.1 |
|             | <i>Bombyx mori</i>                   | <i>BmoE75A, BmoE75B, BmoE75C</i>                                            | NP_001106079.1, NP_001106080.1, NP_001037042.1                                                     |
|             | <i>Bombyx mandarina</i>              | <i>BmaE75X1, BmaE75X2, BmaE75X3</i>                                         | XP_028027338.1, XP_028027339.1, XP_028027340.1                                                     |
|             | <i>Manduca sexta</i>                 | <i>MseE75X1, MseE75X2, MseE75X3</i>                                         | XP_030039289.1, XP_030039296.1, XP_030039301.1                                                     |
|             | <i>Pieris napi</i>                   | <i>PnE75X1, PnE75X2, PnE75X3, PnE75X4, PnE75X5</i>                          | XP_047509890.1, XP_047509891.1, XP_047509892.1, XP_047509893.1                                     |
|             | <i>Zerene cesonia</i>                | <i>ZcE75X1, ZcaE75X2</i>                                                    | XP_038215405.1, XP_038215406.1                                                                     |
